# Supplementary material for: Engineering a tunable bicistronic TetR autoregulation expression system in Gluconobacter oxydans
Source: PeerJ. 2022 Jul 19;10:e13639. doi: 10.7717/peerj.13639 (PMC9306550; doi:10.7717/peerj.13639)
Supplement: Supplemental Information 2 [file peerj-10-13639-s002.xlsx]

## Sheet: Plux UidA Activity
ATc (uM)	Promoter	Activity		Promoter	Activity		Promoter	Activity
0	P0169	2182.61		P264	1041.11		P452	1045.35
0	P0169	2243.48		P264	1067.78		P452	1087.21
0	P0169	2291.3		P264	1045.56		P452	1087.21
0	P0169	2265.22		P264	1152.22		P452	1082.56
0	P0169	2409.43		P264	1576.36		P452	1090
0	P0169	2567.92		P264	1612.73		P452	1101.43
0	P0169	2741.51		P264	1660		P452	1101.43
0	P0169	2624.53		P264	1612.73		P452	1101.43
0	P0169	1983.61		P264	1171.19		P452	990
0	P0169	1996.72		P264	1198.31		P452	1022
0	P0169	1993.44		P264	1228.81		P452	1118
0	P0169	2026.23		P264	1279.66		P452	1098
0	P0169	2277.17		P264	1303.87		P452	1077.05
0.1	P0169	8719.81		P264	4924.24		P452	4742.99
0.1	P0169	9118.36		P264	5113.64		P452	4797.51
0.1	P0169	8381.64		P264	4356.06		P452	4088.79
0.1	P0169	9710.14		P264	4387.63		P452	4306.85
0.1	P0169	9287.44		P264	4482.32		P452	4470.4
0.1	P0169	10290.6		P264	5375.28		P452	4750.59
0.25	P0169	10471		P264	4858.59		P452	5334.89
0.25	P0169	10905.8		P264	4760.1		P452	5295.95
0.25	P0169	11026.6		P264	4136.36		P452	5607.48
0.25	P0169	10217.4		P264	4234.85		P452	5257.01
0.25	P0169	11558		P264	4234.85		P452	5101.25
0.25	P0169	10042.4		P264	5419.43		P452	4364.61
0.5	P0169	9601.45		P264	4955.81		P452	5101.25
0.5	P0169	9541.06		P264	5050.51		P452	6035.83
0.5	P0169	8357.49		P264	4292.93		P452	4244.55
0.5	P0169	7681.16		P264	5650.25		P452	4867.6
0.5	P0169	8067.63		P264	4482.32		P452	5218.07
0.5	P0169	10466.1		P264	4797.98		P452	4542.76
1	P0169	10568.5		P264	4762.22		P452	5876.74
1	P0169	10746.7		P264	5086.67		P452	6555.81
1	P0169	10894.6		P264	4811.11		P452	7086.05
1	P0169	11190.2		P264	4962.22		P452	8439.53
1	P0169	10064.2		P264	4761.82		P452	5525
1	P0169	10607.5		P264	5045.45		P452	5810.71
1	P0169	10996.2		P264	5016.36		P452	5965
1	P0169	11260.4		P264	5270.91		P452	6062.14
1	P0169	9243.44		P264	4083.05		P452	4732
1	P0169	10948.4		P264	4059.32		P452	4784
1	P0169	10650		P264	4157.63		P452	4848
1	P0169	9590.98		P264	4262.71		P452	5316
1	P0169	10563.4		P264	4689.96		P452	5916.75
5	P0169	9529.35		P264	4291.11		P452	5434.88
5	P0169	10194.6		P264	4068.89		P452	5709.3
5	P0169	9998.91		P264	4180		P452	5620.93
5	P0169	9877.17		P264	4002.22		P452	5602.33
5	P0169	9617.92		P264	4391.82		P452	6076.43
5	P0169	10168.9		P264	4460.91		P452	6179.29
5	P0169	10184		P264	4566.36		P452	6099.29
5	P0169	10206.6		P264	4559.09		P452	6382.14
5	P0169	8447.54		P264	4070.34		P452	4570
5	P0169	7919.67		P264	4151.69		P452	4682
5	P0169	8381.97		P264	4216.1		P452	4962
5	P0169	8529.51		P264	4029.66		P452	4778
5	P0169	9421.34		P264	4249.02		P452	5508.05
10	P0169	9520.65		P264	3974.44		P452	5991.86
10	P0169	9877.17		P264	4178.89		P452	6256.98
10	P0169	9798.91		P264	3925.56		P452	6382.56
10	P0169	9933.7		P264	4165.56		P452	6591.86
10	P0169	9848.11		P264	5000.91		P452	5330
10	P0169	10191.5		P264	5266.36		P452	5535.71
10	P0169	9814.15		P264	5411.82		P452	5461.43
10	P0169	9719.81		P264	5553.64		P452	5590
10	P0169	8978.69		P264	3881.36		P452	4393
10	P0169	9050.82		P264	3627.12		P452	4725
10	P0169	9132.79		P264	3955.93		P452	5233
10	P0169	9463.93		P264	4298.31		P452	5213
10	P0169	9610.85		P264	4436.66		P452	5558.7

## Sheet: Ptet UidA activity
ATc (ng/ml)	Promoter	Activity		Promoter	Activity		Promoter	Activity
0	P0169	520.29		P264	31.8182		P452	245.238
0	P0169	517.391		P264	68.1818		P452	273.81
0	P0169	511.594		P264	68.1818		P452	273.81
0	P0169	514.493		P264	86.3636		P452	292.857
0	P0169	302.358		P264	63.848		P452	315.625
0	P0169	249.695		P264	80.156		P452	309.456
0	P0169	368.978		P264	34.8975		P452	309.753
0	P0169	240.753		P264	41.8568		P452	334.375
0	P0169	326.993		P264	71.8656		P452	276.865
10	P0169	851.881		P264	323.585		P452	435.294
10	P0169	1461.99		P264	334.906		P452	435.294
10	P0169	1396.64		P264	319.811		P452	429.167
10	P0169	815.163		P264	327.358		P452	437.5
10	P0169	1845.13		P264	382.449		P452	411.765
10	P0169	1195.96		P264	290.72		P452	447.059
10	P0169	1127.62		P264	306.865		P452	428.168
10	P0169	1214.16		P264	321.189		P452	429.975
10	P0169	1435.56		P264	305.886		P452	464.799
50	P0169	3133.62		P264	660.948		P452	667.5
50	P0169	2771.07		P264	596.946		P452	637.5
50	P0169	3289.54		P264	553.553		P452	657.5
50	P0169	3041.14		P264	630.974		P452	647.5
50	P0169	2649.06		P264	603.823		P452	539.13
50	P0169	3163		P264	721.239		P452	556.522
50	P0169	3147.05		P264	449.362		P452	565.217
50	P0169	3090.42		P264	630.456		P452	617.391
50	P0169	3309.95		P264	609.417		P452	684.189
100	P0169	6355.56		P264	1157.1		P452	976.471
100	P0169	6672.22		P264	1229.65		P452	1023.53
100	P0169	6688.89		P264	1168.7		P452	1011.76
100	P0169	6805.56		P264	1005.47		P452	1141.18
100	P0169	8545.82		P264	1282.17		P452	1309.48
100	P0169	7540.07		P264	1045.82		P452	1222.82
100	P0169	8819.82		P264	1125.39		P452	1028.9
100	P0169	8140.96		P264	978.883		P452	1316.98
100	P0169	7131.42		P264	1178.59		P452	1377.46
100	P0169	8415.65

## Sheet: Bicistronic GFP RFU
Treatment	RFU/OD
a-WT	0.01
a-WT	0.01
a-WT	0.15087
a-WT	0.0458422
a-WT	0.01
a-WT	0.0282283
a-WT	0.127995
a-WT	0.0673
a-WT	0.04381
b-0	0.01
b-0	0.01
b-0	0.343227
b-0	0.229211
b-0	0.01
b-0	0.112913
b-0	0.511982
b-0	0.436983
b-0	0.148697
b-0	0.210126
b-0	0.124126
c-10	118.306
c-10	107.823
c-10	113.468
c-10	106.008
c-10	102.782
c-10	108.287
c-10	76.5521
c-10	109.451
c-10	85.8093
c-10	113.042
c-10	108.506
c-10	102.866
c-10	96.074
d-50	254.018
d-50	236.696
d-50	255.893
d-50	236.205
d-50	235
d-50	244.194
d-50	251.787
d-50	243.897
d-50	252.876
e-100	384.595
e-100	386.356
e-100	402.949
e-100	347.139
e-100	379.181
e-100	497.16
e-100	480.478
e-100	473.58
e-100	428.574
e-100	439.34
e-100	439.7
e-100	462.458
f-200	602.269
f-200	587.849
f-200	598.015
f-200	581.152
f-200	601.844
f-200	593.099
f-200	580.165
f-200	586.463
f-200	604.487
g-500	579.777
g-500	595.402
g-500	560.56
g-500	571.695
g-500	595.189
g-500	585.844
g-500	593.447
g-500	601.532
g-500	581.895
